# Supplementary material
Source: PubMed Central journal article supplement (PMC4956497)
Supplement: NIHMS764006-supplement-01.pdf [file NIHMS764006-supplement-01.pdf]

## Supporting Information

Additional Supporting Information may be found in the online version of this article.

**Figure S1: Flow cytometry using different Tfh stains resulted in similar percentages of TCR75 Tfh cells.** Activated CD44<sup>+</sup> CD4<sup>+</sup> cells from the spleen and lymph nodes of mice seeded with 500 TCR75 cells were examined 10-14d post-sensitization with BALB/c splenocytes and stained for Tfh markers. Sample flow patterns for A&B are from the same mouse as C&D. **A**, Non-TCR75 cells were stained for the Tfh markers FR4 and CXCR5. **B**, V $\beta$ 8.3<sup>+</sup>CD45.1<sup>+</sup> TCR75 cells were stained for the Tfh markers FR4 and CXCR5. **C**, Non-TCR75 cells were stained for the Tfh markers PD-1 and CXCR5. **D**, V $\beta$ 8.3<sup>+</sup>CD45.1<sup>+</sup> TCR75 cells were stained for the Tfh markers PD-1 and CXCR5.
